# Supplementary material
Source: PubMed Central journal article supplement (PMC4502670)
Supplement: kaup-11-01-984273-s001.pdf [file kaup-11-01-984273-s001.pdf]

Supplemental Material to:  
**Identification of secreted proteins that reflect autophagy dynamics within  
tumor cells**

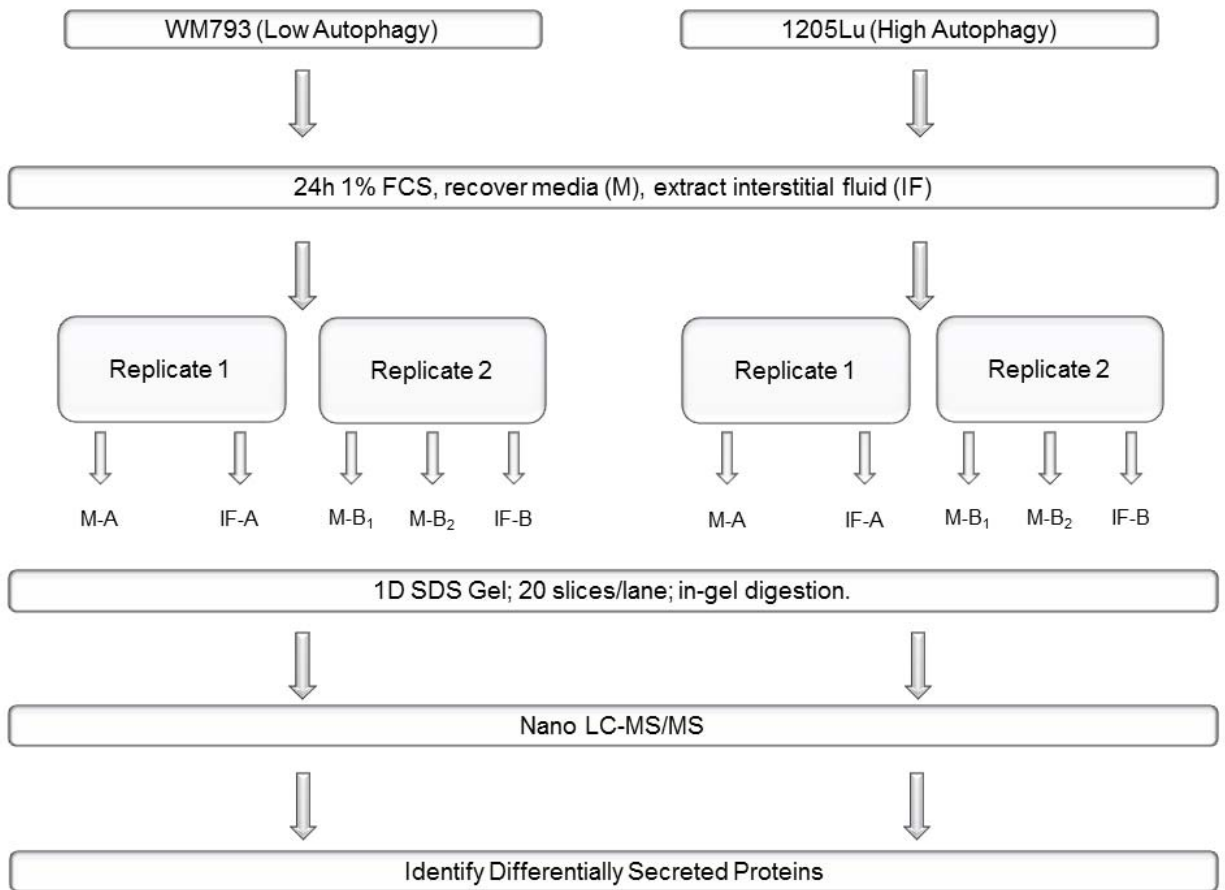

**Figure S1.** Workflow for the comparative secretome analysis of high- and low-autophagy cells. Schematic of the label-free approach used to identify differentially secreted proteins in the conditioned media (M) and the interstitial fluid (IF) of WM793 and 1205Lu cells.

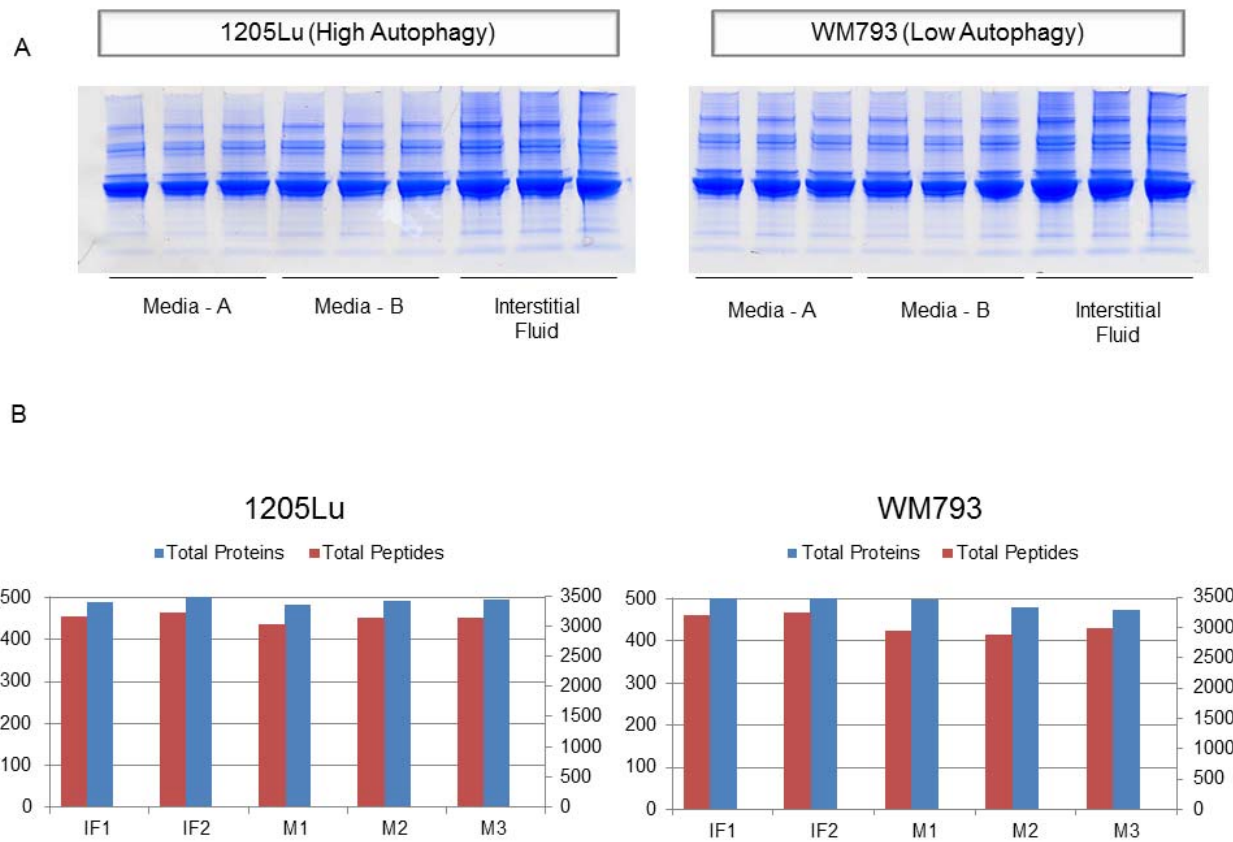

**Figure S2.** SDS-PAGE separation of melanoma conditioned medium and secretome reproducibility. **(A)** “Preparative” minigels of conditioned medium of low- and high- autophagy melanoma cell lines. Gels were run to 2-cm length and excised into 20 1-mm fractions. **(B)** Total protein (left axis) and peptide identifications (right axis) by cell culture compartment and by biological and technical replicates in 1205Lu and WM793 cell lines.

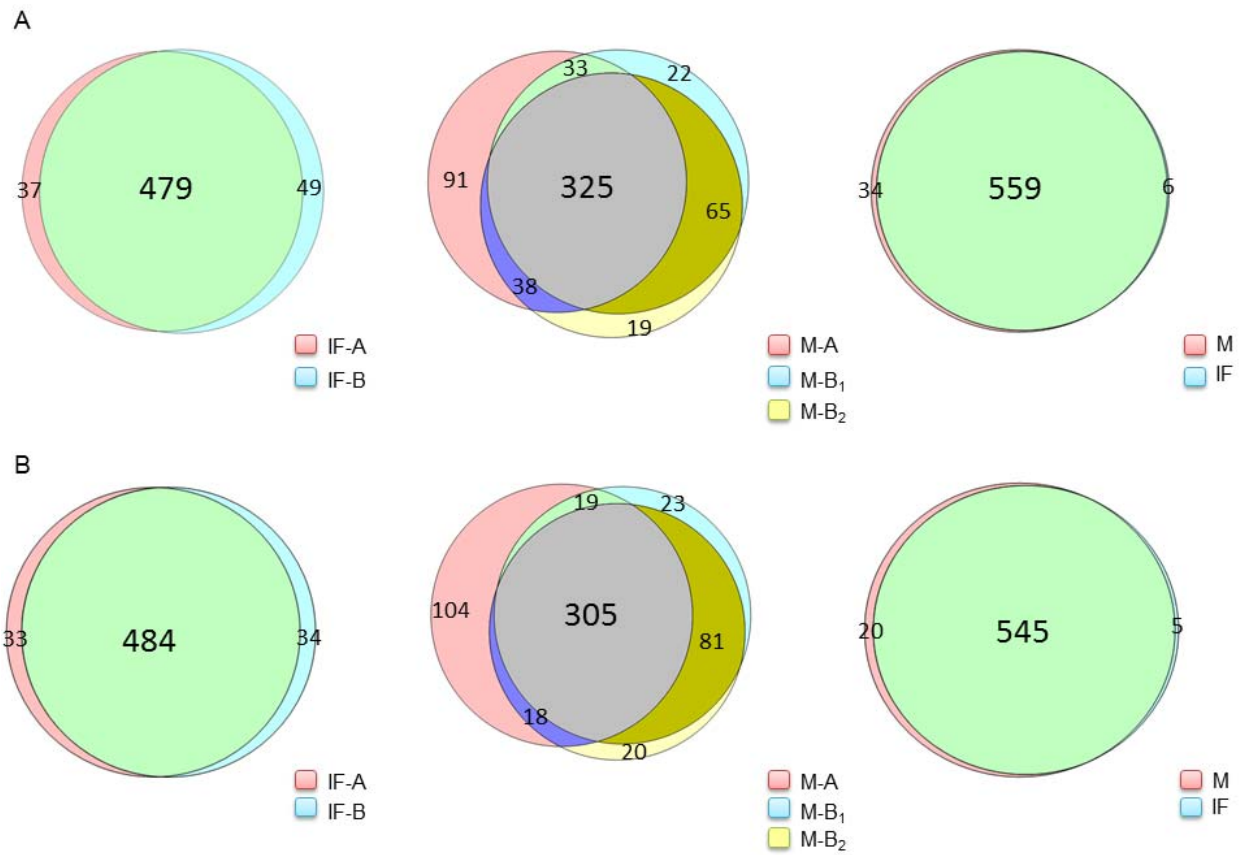

**Figure S3.** Venn diagrams illustrating total numbers of shared and unique proteins identified across: left panels - biological replicates (**A and B**) of interstitial fluid (IF); middle panels – biological replicates (M-A, M-B) and technical replicates (M-B1, M-B<sub>2</sub>) of media; right panels – combined media replicates vs. combined interstitial fluid replicates. (**A**) 1205Lu and (**B**) WM793.

A

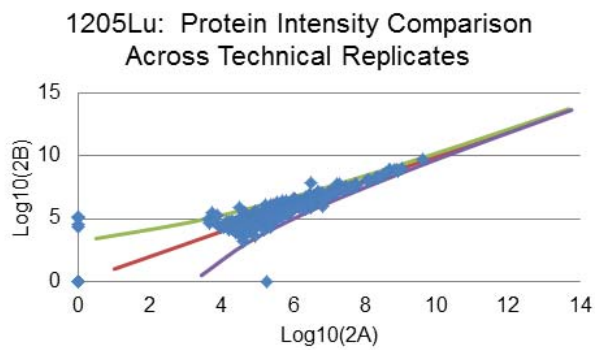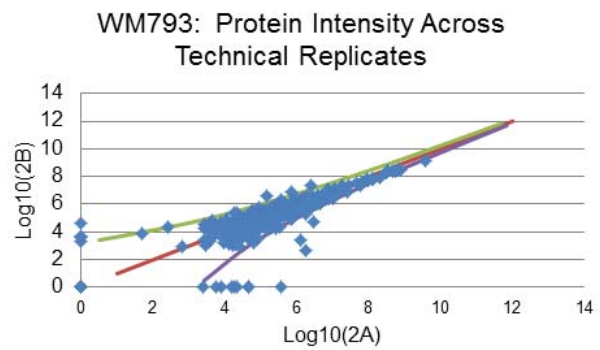

B

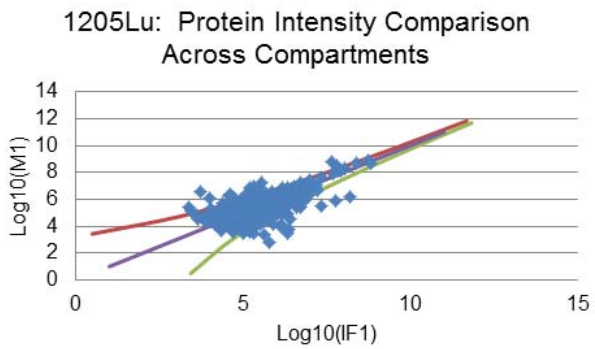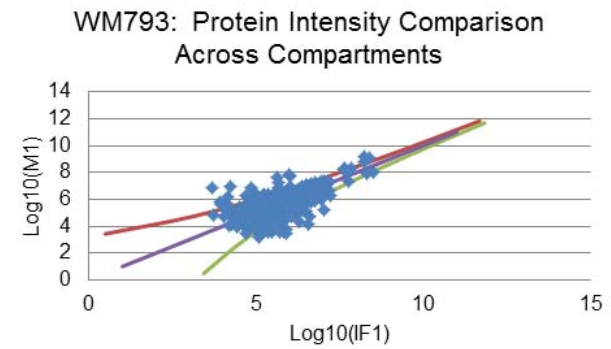

**Figure S4.** Statistical analysis of protein intensity variation across replicates. **(A)** Protein intensity comparison of technical replicates, with associated 95% confidence intervals for 1205Lu and WM793. **(B)** Protein intensity comparison of supernatant and interstitial fluid compartments by cell line with overlaid 95% confidence intervals.

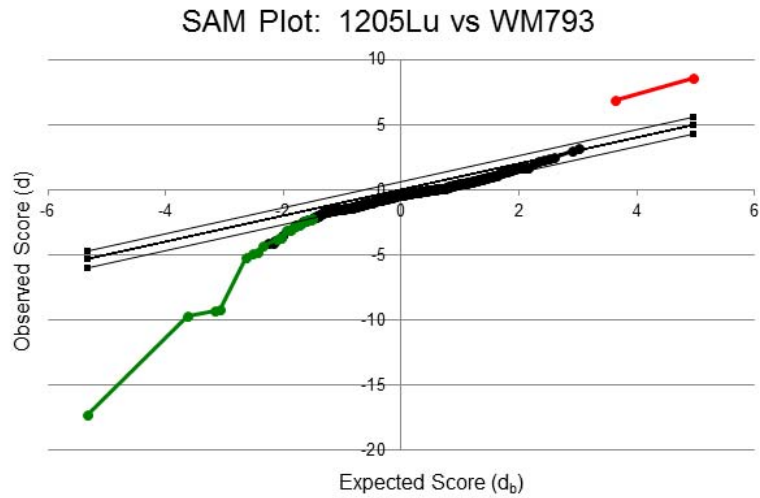

**Figure S5.** SAM analysis and data filtering. SAM plot illustrating observed scores plotted as a function of permuted/expected scores. False discovery rate was set based on the  $\Delta$  tuning parameter. Data points in green represent proteins elevated in 1205Lu, whereas data points in red are those elevated in WM793 (FDR = 3.52%).

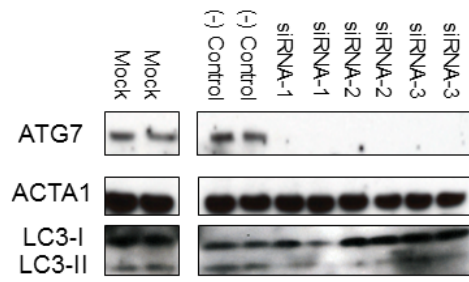

**Figure S6.** ATG7 silencing in WM1346 melanoma cell line. ATG7 and LC3 expression in WM1346 cells 96 h post-transfection with 20 nM siRNA.

**Table S1.** Differentially secreted proteins across high- and low-autophagy melanoma cells.

| Accession ID  | Gene Name | Protein Name                                               | Mean Intensity<br>(1205Lu) | Mean Intensity<br>(WM793) | Fold Change<br>(1205Lu/WM793) |
|---------------|-----------|------------------------------------------------------------|----------------------------|---------------------------|-------------------------------|
| Q16769        | QPCT      | Glutamyl-peptide cyclotransferase                          | 4.30E+06                   | 2.79E+05                  | 15                            |
| P10145-2      | CXCL8     | Chemokine (C-X-C motif) ligand 8 (Interleukin 8)           | 1.64E+06                   | 1.19E+05                  | 14                            |
| P15018        | LIF       | Leukemia inhibitory factor                                 | 6.90E+06                   | 5.20E+05                  | 13                            |
| O00560        | SDCBP     | Syndecan binding protein (syntenin)                        | 6.00E+05                   | 4.75E+04                  | 13                            |
| P01584        | IL1B      | Interleukin 1, beta                                        | 1.19E+05                   | 9.62E+03                  | 12                            |
| C9JF17        | APOD      | Apolipoprotein D                                           | 6.72E+06                   | 5.50E+05                  | 12                            |
| Q92520        | FAM3C     | Family with sequence similarity 3, member C                | 4.77E+06                   | 4.76E+05                  | 10                            |
| Q16610-4      | ECM1      | Extracellular matrix protein 1                             | 1.14E+07                   | 1.25E+06                  | 9.1                           |
| UPI0001AE6B78 | DKK3      | Dickkopf WNT signaling pathway inhibitor 3                 | 1.92E+06                   | 2.19E+05                  | 8.8                           |
| P04083        | ANXA1     | Annexin A1                                                 | 1.20E+05                   | 2.11E+04                  | 5.7                           |
| B2R699        | GM2A      | GM2 ganglioside activator                                  | 8.82E+04                   | 1.58E+04                  | 5.6                           |
| O00468        | AGRN      | Agrin                                                      | 1.06E+06                   | 2.11E+05                  | 5.0                           |
| P16035        | TIMP2     | TIMP metalloproteinase inhibitor 2                         | 2.90E+06                   | 6.40E+05                  | 4.5                           |
| P15121        | AKR1B1    | Aldo-keto reductase family 1, member B1 (aldose reductase) | 1.54E+07                   | 3.77E+06                  | 4.1                           |
| B3KQF4        | TIMP1     | TIMP metalloproteinase inhibitor 1                         | 5.04E+07                   | 1.25E+07                  | 4.0                           |
| P22314        | UBA1      | Ubiquitin-like modifier activating enzyme 1                | 2.85E+06                   | 7.42E+05                  | 3.8                           |
| UPI0000445E06 | ACTG1P2   | Actin, gamma 1 pseudogene 2                                | 8.12E+04                   | 2.22E+04                  | 3.7                           |
| P07942        | LAMB1     | Laminin, beta 1                                            | 2.66E+07                   | 7.82E+06                  | 3.4                           |
| P01034        | CST3      | Cystatin C                                                 | 1.21E+06                   | 3.68E+05                  | 3.3                           |
| Q2TU84        | GLCC1     | Glucocorticoid induced transcript 1                        | 3.75E+05                   | 1.19E+05                  | 3.2                           |
| P45877        | PPIC      | Peptidylprolyl isomerase C (cyclophilin C)                 | 7.46E+05                   | 2.44E+05                  | 3.1                           |
| Q14914        | PTGR1     | Prostaglandin reductase 1                                  | 4.02E+05                   | 1.43E+05                  | 2.8                           |
| A8K061        | ANGPTL3   | Angiopoietin-like 3                                        | 1.24E+06                   | 4.65E+05                  | 2.7                           |
| P08670        | VIM       | Vimentin                                                   | 7.09E+06                   | 2.64E+06                  | 2.7                           |
| Q59GM9        | GOT1      | Glutamic-oxaloacetic transaminase 1, soluble               | 3.11E+05                   | 1.15E+05                  | 2.7                           |
| Q16674        | MIA       | Melanoma inhibitory activity                               | 1.44E+06                   | 6.20E+05                  | 2.3                           |
| A6NII8        | LCN2      | Lipocalin 2                                                | 5.33E+06                   | 1.85E+07                  | -3.5                          |
| Q9NRR1        | CYTL1     | Cytokine-like 1                                            | 4.12E+04                   | 2.68E+05                  | -6.5                          |
